# Supplementary material for: C. elegans enteric motor neurons fire synchronized action potentials underlying the defecation motor program
Source: PubMed Central journal article supplement (PMC9120479; doi:10.1038/s41467-022-30452-y), 2022-05-19
Supplement: 41467_2022_30452_MOESM6_ESM.pdf [file 41467_2022_30452_MOESM6_ESM.pdf]

## Reporting Summary

Nature Portfolio wishes to improve the reproducibility of the work that we publish. This form provides structure for consistency and transparency in reporting. For further information on Nature Portfolio policies, see our [Editorial Policies](#) and the [Editorial Policy Checklist](#).

### Statistics

For all statistical analyses, confirm that the following items are present in the figure legend, table legend, main text, or Methods section.

n/a Confirmed

- The exact sample size ( $n$ ) for each experimental group/condition, given as a discrete number and unit of measurement
- A statement on whether measurements were taken from distinct samples or whether the same sample was measured repeatedly
- The statistical test(s) used AND whether they are one- or two-sided  
*Only common tests should be described solely by name; describe more complex techniques in the Methods section.*
- A description of all covariates tested
- A description of any assumptions or corrections, such as tests of normality and adjustment for multiple comparisons
- A full description of the statistical parameters including central tendency (e.g. means) or other basic estimates (e.g. regression coefficient) AND variation (e.g. standard deviation) or associated estimates of uncertainty (e.g. confidence intervals)
- For null hypothesis testing, the test statistic (e.g.  $F$ ,  $t$ ,  $r$ ) with confidence intervals, effect sizes, degrees of freedom and  $P$  value noted  
*Give  $P$  values as exact values whenever suitable.*
- For Bayesian analysis, information on the choice of priors and Markov chain Monte Carlo settings
- For hierarchical and complex designs, identification of the appropriate level for tests and full reporting of outcomes
- Estimates of effect sizes (e.g. Cohen's  $d$ , Pearson's  $r$ ), indicating how they were calculated

*Our web collection on [statistics for biologists](#) contains articles on many of the points above.*

### Software and code

Policy information about [availability of computer code](#)

Data collection

Electrophysiology: Patchmaster v2x90 (Heka)  
Calcium imaging: MATLAB R2018a (MathWorks) Custom code was submitted with this manuscript

Data analysis

Electrophysiology: OriginPro2020 (OriginLab)  
Calcium imaging and Modeling: MATLAB R2018a (MathWorks) Custom code was submitted with this manuscript

For manuscripts utilizing custom algorithms or software that are central to the research but not yet described in published literature, software must be made available to editors and reviewers. We strongly encourage code deposition in a community repository (e.g. GitHub). See the Nature Portfolio [guidelines for submitting code & software](#) for further information.

### Data

Policy information about [availability of data](#)

All manuscripts must include a [data availability statement](#). This statement should provide the following information, where applicable:

- Accession codes, unique identifiers, or web links for publicly available datasets
- A description of any restrictions on data availability
- For clinical datasets or third party data, please ensure that the statement adheres to our [policy](#)

Data used in this manuscript are deposited in the Mendeley Database (doi: 10.17632/33mnszcbh8.1)

## Field-specific reporting

Please select the one below that is the best fit for your research. If you are not sure, read the appropriate sections before making your selection.

Life sciences  Behavioural & social sciences  Ecological, evolutionary & environmental sciences

For a reference copy of the document with all sections, see [nature.com/documents/nr-reporting-summary-flat.pdf](https://www.nature.com/documents/nr-reporting-summary-flat.pdf)

## Life sciences study design

All studies must disclose on these points even when the disclosure is negative.

|                 |                                                                                                                                                                                                                                                                                                                                                                                                                                                                                                                                                                                                                                                                                                                                                                                                                                                                                                                                                                                                                                                                                                                                                                                                                                                                                                                                                                                                                                                                                                                                                                                                             |
|-----------------|-------------------------------------------------------------------------------------------------------------------------------------------------------------------------------------------------------------------------------------------------------------------------------------------------------------------------------------------------------------------------------------------------------------------------------------------------------------------------------------------------------------------------------------------------------------------------------------------------------------------------------------------------------------------------------------------------------------------------------------------------------------------------------------------------------------------------------------------------------------------------------------------------------------------------------------------------------------------------------------------------------------------------------------------------------------------------------------------------------------------------------------------------------------------------------------------------------------------------------------------------------------------------------------------------------------------------------------------------------------------------------------------------------------------------------------------------------------------------------------------------------------------------------------------------------------------------------------------------------------|
| Sample size     | No sample-size calculation was performed. Sample sizes were chosen based on empirical knowledge of sample variability. My previous work published in Cell (Liu et al., 2018) and similar studies published in Nature Communications (Chen et al., 2017; Liu et al., 2017; Liu et al., 2013; 2014; 2020).<br><br>Reference:<br>Chen, B., Liu, P., Hujber, E.J., Li, Y., Jorgensen, E.M., and Wang, Z.W. (2017). AIP limits neurotransmitter release by inhibiting calcium bursts from the ryanodine receptor. <i>Nat Commun</i> 8, 1380. 10.1038/s41467-017-01704-z.<br>Liu, P., Chen, B., Mailler, R., and Wang, Z.W. (2017). Antidromic-rectifying gap junctions amplify chemical transmission at functionally mixed electrical-chemical synapses. <i>Nat Commun</i> 8, 14818. 10.1038/ncomms14818.<br>Liu, P., Chen, B., and Wang, Z.W. (2013). Postsynaptic current bursts instruct action potential firing at a graded synapse. <i>Nat Commun</i> 4, 1911. 10.1038/ncomms2925.<br>Liu, P., Chen, B., and Wang, Z.W. (2014). SLO-2 potassium channel is an important regulator of neurotransmitter release in <i>Caenorhabditis elegans</i> . <i>Nat Commun</i> 5, 5155. 10.1038/ncomms6155.<br>Liu, P., Chen, B., and Wang, Z.W. (2020). GABAergic motor neurons bias locomotor decision-making in <i>C. elegans</i> . <i>Nat Commun</i> 11, 5076. 10.1038/s41467-020-18893-9.<br>Liu, Q., Kidd, P.B., Dobosiewicz, M., and Bargmann, C.I. (2018). <i>C. elegans</i> AWA Olfactory Neurons Fire Calcium-Mediated All-or-None Action Potentials. <i>Cell</i> 175, 57-70 e17. 10.1016/j.cell.2018.08.018. |
| Data exclusions | Pre-established data exclusion criteria for electrophysiological recording: only patch clamps with a seal resistance above 1 GΩ and uncompensated series resistance below 100 MΩ will be accepted for further analysis.                                                                                                                                                                                                                                                                                                                                                                                                                                                                                                                                                                                                                                                                                                                                                                                                                                                                                                                                                                                                                                                                                                                                                                                                                                                                                                                                                                                     |
| Replication     | Replications were conducted for 1-5 times for any given recordings while the preparations lasts.                                                                                                                                                                                                                                                                                                                                                                                                                                                                                                                                                                                                                                                                                                                                                                                                                                                                                                                                                                                                                                                                                                                                                                                                                                                                                                                                                                                                                                                                                                            |
| Randomization   | Animals for experiments were randomly selected from a culture dish with hundreds of animals with the same genotype.                                                                                                                                                                                                                                                                                                                                                                                                                                                                                                                                                                                                                                                                                                                                                                                                                                                                                                                                                                                                                                                                                                                                                                                                                                                                                                                                                                                                                                                                                         |
| Blinding        | No                                                                                                                                                                                                                                                                                                                                                                                                                                                                                                                                                                                                                                                                                                                                                                                                                                                                                                                                                                                                                                                                                                                                                                                                                                                                                                                                                                                                                                                                                                                                                                                                          |

## Reporting for specific materials, systems and methods

We require information from authors about some types of materials, experimental systems and methods used in many studies. Here, indicate whether each material, system or method listed is relevant to your study. If you are not sure if a list item applies to your research, read the appropriate section before selecting a response.

### Materials & experimental systems

| n/a                                 | Involved in the study                                           |
|-------------------------------------|-----------------------------------------------------------------|
| <input checked="" type="checkbox"/> | <input type="checkbox"/> Antibodies                             |
| <input checked="" type="checkbox"/> | <input type="checkbox"/> Eukaryotic cell lines                  |
| <input checked="" type="checkbox"/> | <input type="checkbox"/> Palaeontology and archaeology          |
| <input type="checkbox"/>            | <input checked="" type="checkbox"/> Animals and other organisms |
| <input checked="" type="checkbox"/> | <input type="checkbox"/> Human research participants            |
| <input checked="" type="checkbox"/> | <input type="checkbox"/> Clinical data                          |
| <input checked="" type="checkbox"/> | <input type="checkbox"/> Dual use research of concern           |

### Methods

| n/a                                 | Involved in the study                           |
|-------------------------------------|-------------------------------------------------|
| <input checked="" type="checkbox"/> | <input type="checkbox"/> ChIP-seq               |
| <input checked="" type="checkbox"/> | <input type="checkbox"/> Flow cytometry         |
| <input checked="" type="checkbox"/> | <input type="checkbox"/> MRI-based neuroimaging |

## Animals and other organisms

Policy information about [studies involving animals](#); [ARRIVE guidelines](#) recommended for reporting animal research

|                         |                                                                                                           |
|-------------------------|-----------------------------------------------------------------------------------------------------------|
| Laboratory animals      | 3-days old <i>C. elegans</i> hermaphrodites. Wild-type is Bristol strain N2 and its variant strain PD1074 |
| Wild animals            | No wild animals were used in the study                                                                    |
| Field-collected samples | No field collected samples were used in the study                                                         |

Ethics oversight

This study on invertebrate animal *C. elegans* did not require an ethical approval.

Note that full information on the approval of the study protocol must also be provided in the manuscript.
